# Supplementary material for: Sound Localization Ability in Dogs
Source: MDPI journal article supplement (doi:10.3390/vetsci9110619), 2022-11-08
Supplement: s1 [file s1]

**Table S1: Test-related data of dogs.**

| Dog | Mean $\pm$ SD of the last six reversals in the ascending procedure | N° of sessions to reach the 1st of the last six reversals in descending (D) and ascending (A) procedures |
|-----|--------------------------------------------------------------------|----------------------------------------------------------------------------------------------------------|
| 1   | 5.2 $\pm$ 1.0°                                                     | D = 15; A = 5                                                                                            |
| 2   | 11.2 $\pm$ 1.0°                                                    | D = 11; A = 13                                                                                           |
| 3   | 1.3 $\pm$ 0.5°                                                     | D = 25; A = 11                                                                                           |
| 4   | 6.2 $\pm$ 0.75°                                                    | D = 14; A = 9                                                                                            |
| 5   | 6.5 $\pm$ 0.5°                                                     | D = 20; A = 6                                                                                            |
| 6   | 6.3 $\pm$ 0.8°                                                     | D = 24; A = 9                                                                                            |
| 7   | 5.8 $\pm$ 0.75°                                                    | D = 14; A = 12                                                                                           |
| 8   | 6.2 $\pm$ 1.2°                                                     | D = 15; A = 24                                                                                           |
| 9   | 13.2 $\pm$ 1.2°                                                    | D = 17; A = 11                                                                                           |
| 10  | 11.5 $\pm$ 1.2°                                                    | D = 14; A = 10                                                                                           |
